# Supplementary material for: The Impact of Long-term Care Needs on the Socio-economic Deprivation of Older People and Their Families: a Scoping Review Protocol
Source: Research Square preprint supplement (doi:10.21203/rs.3.rs-816117/v1), 2021-09-21
Supplement: Supplementary file 1 [file 176c1aa07425805090303186.docx]

| *Pre-conditions*  *ageing process* as a condition predisposing to a significant performance decline  impaired health status = chronic illness conditions due to the onset of serious physical and/or psychological and cognitive problems; deterioration in quality of life following such disabling problems1  growing need for long-term care among older people; most of them can only rely on *informal* long-term care, provided by adult children or other **family caregivers**2  *Dynamics and factors under observation*    **socio-economic deprivation**3 of older people afflicted with ADL limitations and their **families**4 (both the direct and indirect costs of informal caregiving, e.g. *work-related costs* of providing unpaid care)  likelihood that *informal* caregivers will support older people *as front-line care providers* = likelihood that they will experience long hours of caregiving, associated with social deprivation, and economic hardships due to having to pay medical expenses  availability and affordability of *formal* long-term care services among impaired older people    **DEPENDENT VARIABLE**  **INDEPENDENT VARIABLES**    *social skills among family caregivers as buffering factor* |
| --- |

### 
